# Supplementary material for: Defects and sulfur-doping design of porous carbon spheres for high-capacity potassium-ion storage
Source: Royal Society of Chemistry journal article supplement (doi:10.1039/d1ta09337a), 2021-11-19
Supplement: d1ta09337a1.pdf [file d1ta09337a1.pdf]

## Supporting Information

### **Defects and sulfur-doping design of porous carbon spheres for high-capacity potassium-ion storage**

Ruling Huang,<sup>a</sup> Xixue Zhang,<sup>a</sup> Zexi Qu,<sup>a</sup> Xiaodong Zhang,<sup>a</sup> Jiao Lin,<sup>a</sup> Feng Wu,<sup>a,b,c,d</sup>,  
Renjie Chen<sup>a,b,c\*</sup> and Li Li<sup>a,b,c,d\*</sup>

<sup>a</sup>Beijing Key Laboratory of Environmental Science and Engineering, School of Materials Science and Engineering, Beijing Institute of Technology, Beijing 100081, China.

<sup>b</sup>Advanced Technology Research Institute, Beijing Institute of Technology, Jinan 250300, China.

<sup>c</sup>Collaborative Innovation Center of Electric Vehicles in Beijing, Beijing 100081, China.

<sup>d</sup>Guangdong Key Laboratory of Battery Safety, Guangzhou Institute of Energy Testing, Guangzhou, Guangdong 511447, China.

\*Corresponding author

*E-mail* address: chenrj@bit.edu.cn; lily863@bit.edu.cn

## Figures

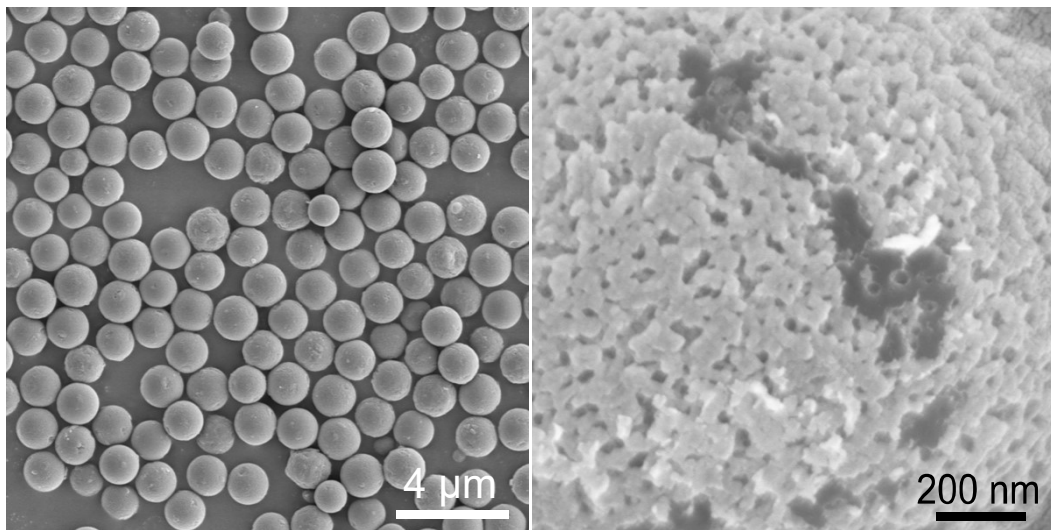

**Fig. S1.** SEM images of CMSs.

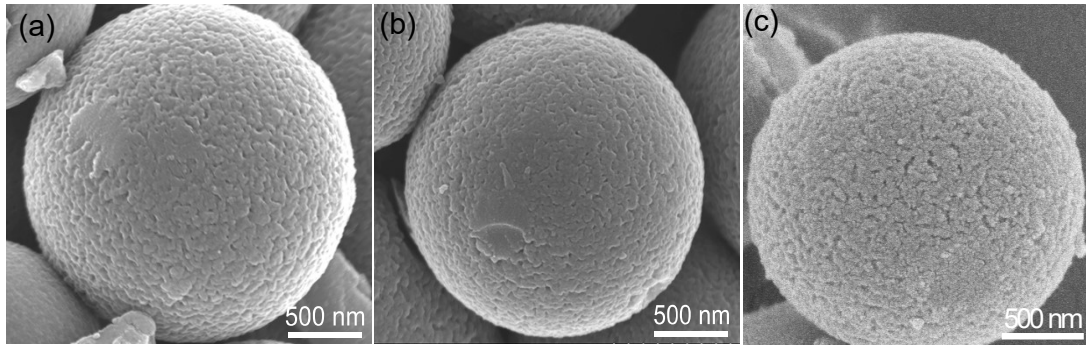

**Fig. S2.** SEM image of (a) SPCS-600, (b) SPCS-800, and (c) PCS-700.

**Fig. S3.** (a) XPS full surveys of various SPCS and PCS. S 2p XPS spectrum of (b) SPCS-600 and (c) SPCS-800. C 1s XPS spectrum of (d) SPCS-600, (e) SPCS-800, and (f) PCS-700.

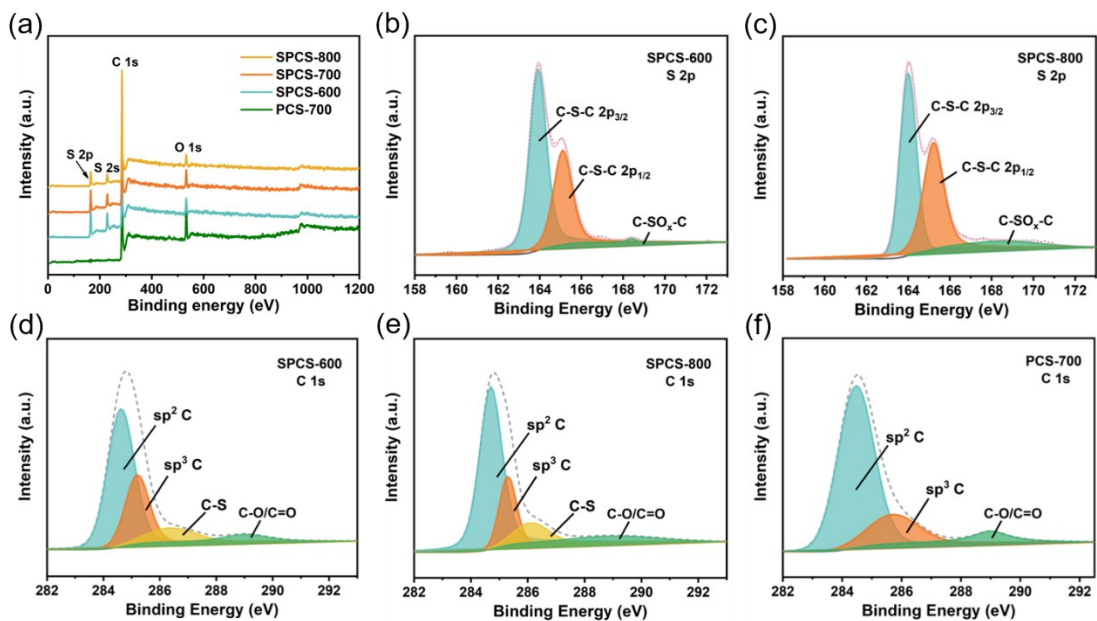

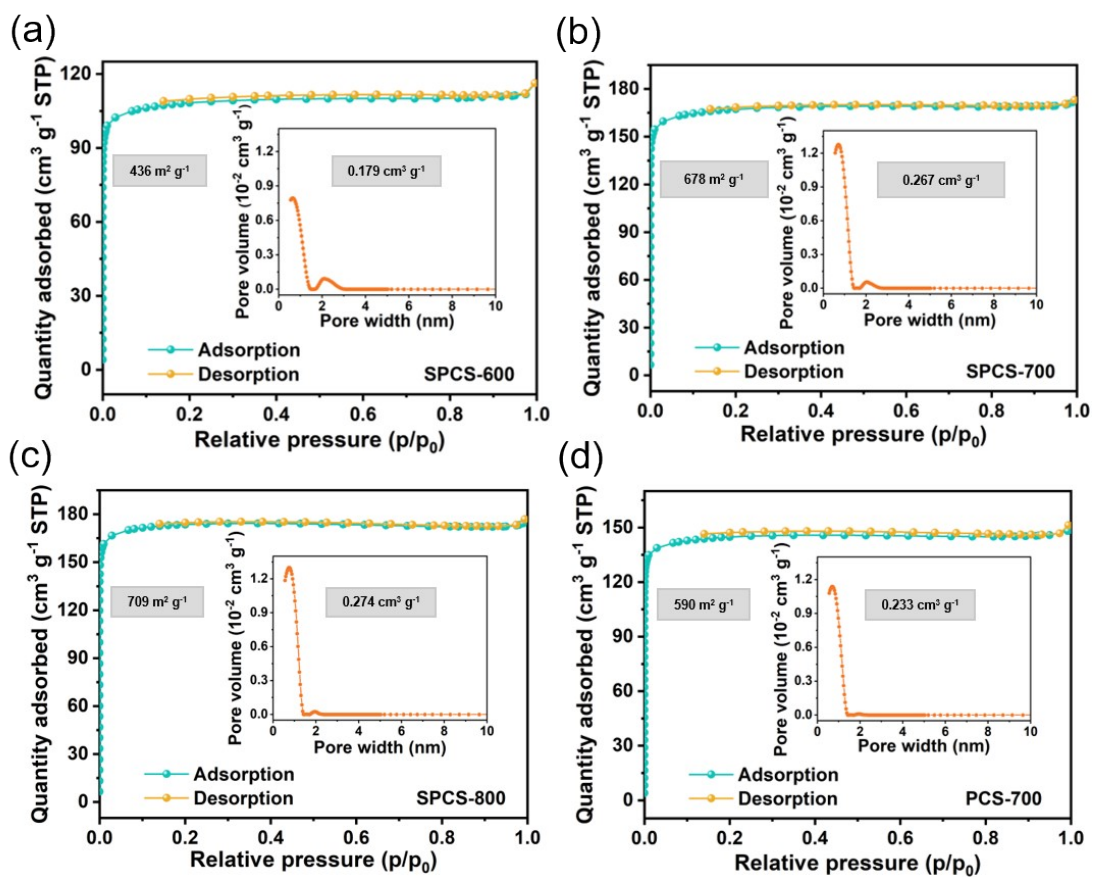

**Fig. S4.**  $N_2$  adsorption–desorption isotherm curve and pore size distribution (insets) of (a) SPCS-600; (b) SPCS-700; (c) SPCS-800; and (d) PCS-700.

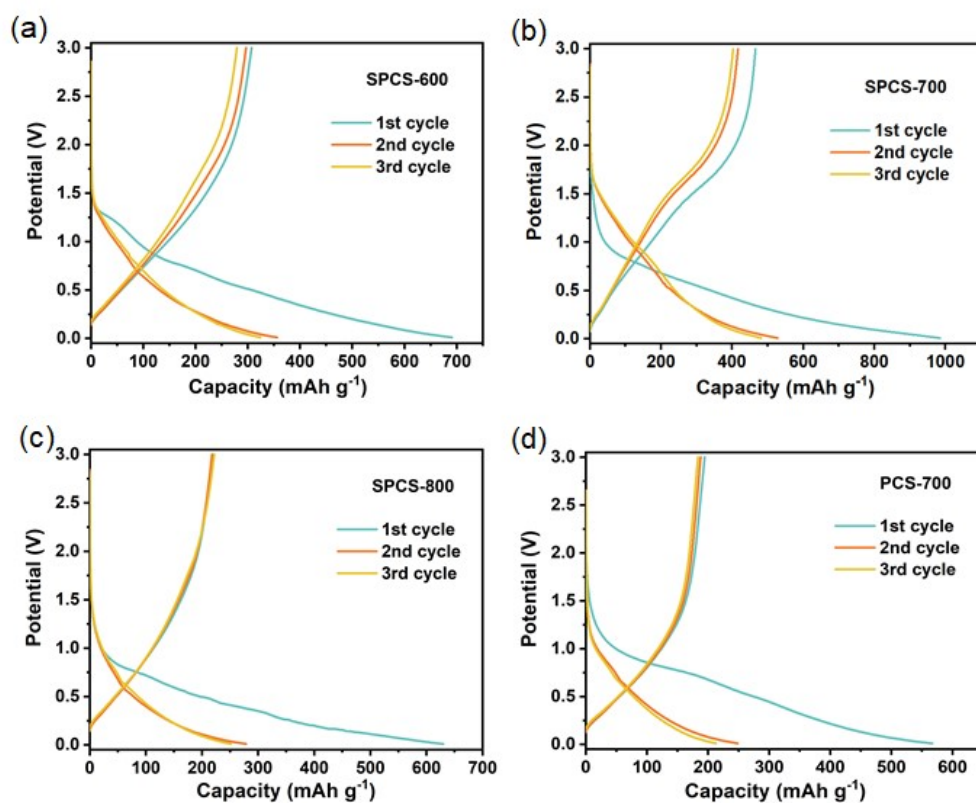

**Fig. S5.** Electrochemical charge/discharge profiles of (a) SPCS-600 electrode; (b) SPCS-700 electrode, (c) SPCS-800 electrode, and (d) PCS electrode for the initial three cycles at a current density of  $50 \text{ mA g}^{-1}$ .

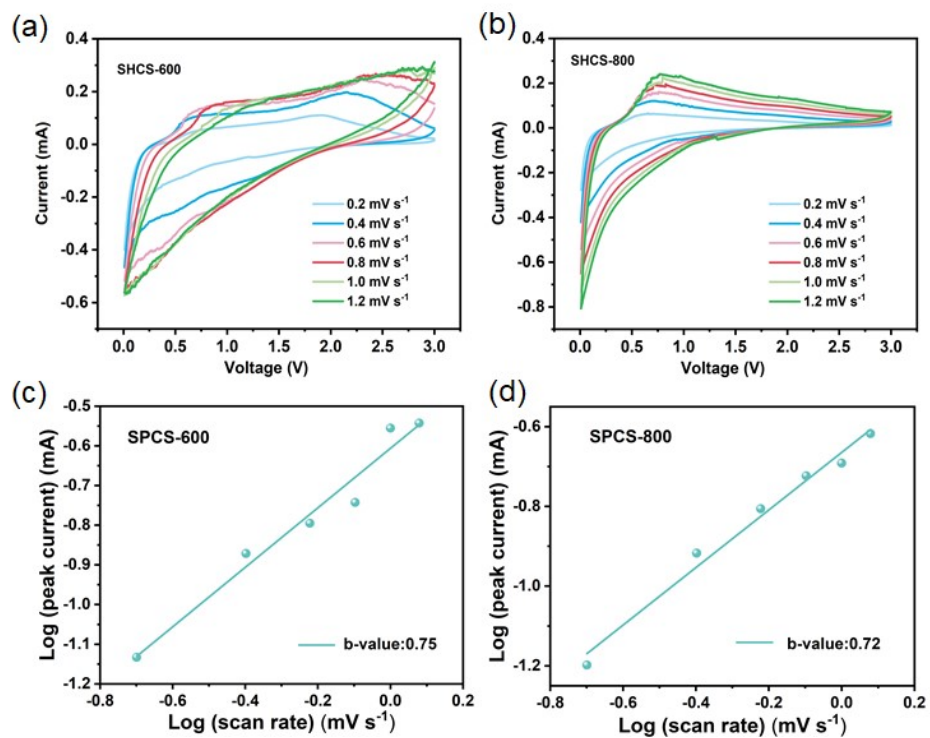

**Fig. S6.** CV curves of (a) SPCS-600 electrode and (b) SPCS-800 electrode at various scan rates from 0.2 to 1.2  $\text{mV s}^{-1}$ . The b-values of (c) SPCS-600 electrode and (d) SPCS-800 electrode.

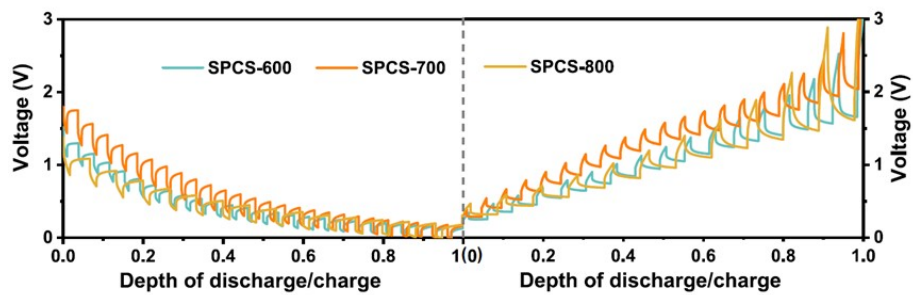

**Fig. S7.** (a) GITT profiles of various SPCS electrode during the second discharge/charge process.



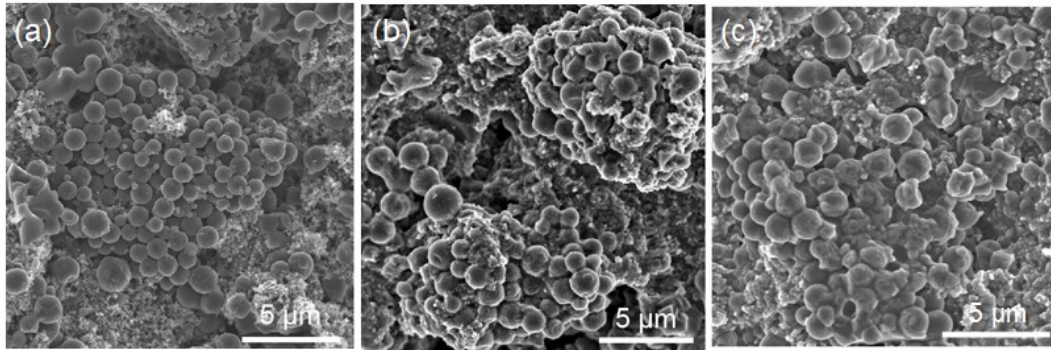

**Fig. S8.** SEM images of SPCS-700 electrode: (a) before the first cycle; and (b) after 100 cycles. (c) SEM images of PCS electrode after 100 cycles.

**Table S1.** Physical parameters for various SPCS and PCS-700.

| Samples  | $S_{\text{BET}}$<br>[ $\text{m}^2 \text{g}^{-1}$ ] | $V_t$<br>[ $\text{cm}^3 \text{g}^{-1}$ ] | $d_{002}$<br>[nm] | XPS composition [wt%] |       |       |
|----------|----------------------------------------------------|------------------------------------------|-------------------|-----------------------|-------|-------|
|          |                                                    |                                          |                   | C                     | O     | S     |
| SPCS-600 | 436                                                | 0.179                                    | 0.376             | 81.52                 | 6.92  | 11.56 |
| SPCS-700 | 678                                                | 0.267                                    | 0.387             | 84.23                 | 7.31  | 8.46  |
| SPCS-800 | 709                                                | 0.274                                    | 0.395             | 88.82                 | 4.97  | 6.21  |
| PCS-700  | 590                                                | 0.233                                    | -                 | 88.43                 | 11.57 | -     |

**Table S2.** Potassium storage performance of SPCS-700 compared with previously reported materials.

| Materials                                   | Reversible Capacity & Rate                                                                                | Cyclability                                                       | Ref.      |
|---------------------------------------------|-----------------------------------------------------------------------------------------------------------|-------------------------------------------------------------------|-----------|
| SPCS-700                                    | 406 mAh g <sup>-1</sup> @ 50mA g <sup>-1</sup><br>216 mAh g <sup>-1</sup> @ 1000mA g <sup>-1</sup>        | 188.9 mAh g <sup>-1</sup> /1000 cycles<br>@ 0.5 A g <sup>-1</sup> | This work |
| S/O-codoped porous hard carbon microspheres | 226.6 mAh g <sup>-1</sup> @ 50mA g <sup>-1</sup><br>158 mAh g <sup>-1</sup> @ 1000mA g <sup>-1</sup>      | 108.4 mAh g <sup>-1</sup> /2000 cycles<br>@ 1 A g <sup>-1</sup>   | 1         |
| Hierarchically porous thin carbon shells    | 235 mAh g <sup>-1</sup> @ 100 mA g <sup>-1</sup><br>64 mAh g <sup>-1</sup> @ 4000 mA g <sup>-1</sup>      | 65 mAh g <sup>-1</sup> /900 cycles<br>@ 2 A g <sup>-1</sup>       | 2         |
| N-doped porous hollow carbon spheres        | 280 mAh g <sup>-1</sup> @ 28 mA g <sup>-1</sup><br>134 mAh g <sup>-1</sup> @ 5600 mA g <sup>-1</sup>      | 154 mAh g <sup>-1</sup> /500 cycles<br>@ 1.4 A g <sup>-1</sup>    | 3         |
| N/O-codoped porous hard carbon              | 365 mAh g <sup>-1</sup> @ 25 mA g <sup>-1</sup><br>118 mAh g <sup>-1</sup> @ 3000 mA g <sup>-1</sup>      | 230 mAh g <sup>-1</sup> /100 cycles<br>@ 0.05 A g <sup>-1</sup>   | 4         |
| Hard-soft composite carbon                  | 230 mAh g <sup>-1</sup> @ 140 mA g <sup>-1</sup><br>167 mAh g <sup>-1</sup> @ 1400 mA g <sup>-1</sup>     | 200 mAh g <sup>-1</sup> /200 cycles<br>@ 0.28 A g <sup>-1</sup>   | 5         |
| N/O-codoped hard carbon                     | 304.6 mAh g <sup>-1</sup> @ 100 mA g <sup>-1</sup><br>178.9 mAh g <sup>-1</sup> @ 5000 mA g <sup>-1</sup> | 189.5 mAh g <sup>-1</sup> /5000 cycles<br>@ 1 A g <sup>-1</sup>   | 6         |
| Mesoporous carbon                           | 286.4 mAh g <sup>-1</sup> @ 50 mA g <sup>-1</sup><br>144.2 mAh g <sup>-1</sup> @ 1000 mA g <sup>-1</sup>  | 146.5 mAh g <sup>-1</sup> /1000 cycles<br>@ 1 A g <sup>-1</sup>   | 7         |
| S/N-codoped hard carbon                     | 276 mAh g <sup>-1</sup> @ 100 mA g <sup>-1</sup><br>174 mAh g <sup>-1</sup> @ 3000 mA g <sup>-1</sup>     | 213.7 mAh g <sup>-1</sup> /500 cycles<br>@ 0.1 A g <sup>-1</sup>  | 8         |
| N/S-codoped graphene nanosheets             | 348.2 mAh g <sup>-1</sup> @ 50 mA g <sup>-1</sup><br>204.3 mAh g <sup>-1</sup> @ 2000 mA g <sup>-1</sup>  | 203 mAh g <sup>-1</sup> /500 cycles<br>@ 1 A g <sup>-1</sup>      | 9         |
| Soft carbon                                 | 273 mAh g <sup>-1</sup> @ ~7 mA g <sup>-1</sup><br>140 mAh g <sup>-1</sup> @ 1395 mA g <sup>-1</sup>      | 150.6 mAh g <sup>-1</sup> /50 cycles<br>@ 0.558 A g <sup>-1</sup> | 10        |
| N/O-codoped carbon network                  | 382 mAh g <sup>-1</sup> @ 50 mA g <sup>-1</sup><br>181 mAh g <sup>-1</sup> @ 2000 mA g <sup>-1</sup>      | 160 mAh g <sup>-1</sup> /4000 cycles<br>@ 1 A g <sup>-1</sup>     | 11        |
| Carbon nanofiber foam                       | 240 mAh g <sup>-1</sup> @ 50 mA g <sup>-1</sup><br>164 mAh g <sup>-1</sup> @ 1000 mA g <sup>-1</sup>      | 158 mAh g <sup>-1</sup> /2000 cycles<br>@ 1 A g <sup>-1</sup>     | 12        |
| porous N-doped carbon fibers                | 197 mAh g <sup>-1</sup> @ 50 mA g <sup>-1</sup><br>57 mAh g <sup>-1</sup> @ 250 mA g <sup>-1</sup>        | 65 mAh g <sup>-1</sup> /346 cycles<br>@ 0.1 A g <sup>-1</sup>     | 13        |

## References

- 1 M. Chen, W. Wang, X. Liang, S. Gong, J. Liu, Q. Wang, S. Guo and H. Yang, *Adv. Energy Mater.*, 2018, **8**, 1800171.
- 2 A. Mahmood, L. Shuai, Z. Ali, H. Tabassum and Y. Zhao, *Adv. Mater.*, 2018, **31**, 1805430.
- 3 D. Qiu, J. Guan, M. Li, C. Kang, J. Wei, Y. Li, Z. Xie, F. Wang and R. Yang, *Adv. Funct. Mater.*, 2019, **29**, 1903496.
- 4 J. Yang, Z. Ju, J. Yong, X. Zheng and S. Xiong, *Adv. Mater.*, 2017, **30**, 1700104.
- 5 Z. Jian, S. Hwang, Z. Li, A. S. Hernandez, X. Wang, Z. Xing, D. Su and X. Ji, *Adv. Funct. Mater.*, 2017, **27**, 1700324.
- 6 R. C. Cui, B. Xu, H. J. Dong, C. C. Yang and Q. Jiang, *Adv. Sci.*, 2020, **7**, 1902547.
- 7 W. Wei, J. Zhou, Z. Wang, L. Zhao and S. Guo, *Adv. Energy Mater.*, 2018, **8**, 1701648.
- 8 Y. Liu, H. Dai, L. Wu, W. Zhou, L. He, W. Wang, W. Yan, Q. Huang, L. Fu and Y. Wu, *Adv. Energy Mater.*, 2019, **9**, 1901379.
- 9 W. Yang, J. Zhou, S. Wang, Z. Wang and S. Guo, *ACS Energy Lett.*, 2020, **5**, 1653–1661.
- 10 Y. Liu, Y. Lu, Y. Xu, Q. Meng, J. Gao, Y. Sun, Y. Hu, B. Chang, C. Liu and A. Cao, *Adv. Mater.*, 2020, **32**, 2000505.
- 11 J. Ruan, Y. Zhao, S. Luo, T. Yuan and S. Zheng, *Energy Storage Mater.*, 2019, **23**, 46-54.
- 12 H. Zheng, C. Qing, Z. Avi, N. Yang and D. Cao, *Nano letters*, 2018, **18**, 7407–7413.
- 13 Z. Chen, V. Augustyn, X. Jia, Q. Xiao, B. Dunn and Y. Lu, *Acs Nano*, 2012, **6**, 4319-4327.
